# Supplementary material
Source: MDPI journal article supplement (https://www.mdpi.com/2071-1050/14/2/760)
Supplement: s1 [file s1 › sustainability-1540288-supplementary.xlsx]

## Sheet: Data
id	Age	Gender	Level of education	Length of using SM	1. Please select which settings your profile has on the following social [Blogs and microblogs]	1. Please select which settings your profile has on the following social [Social portals]	1. Please select which settings your profile has on the following social [Content communities]	1. Please select which settings your profile has on the following social [Rating portals]	1. Please select which settings your profile has on the following social [Travel forums]	2. Please indicate your opinion: I use social media during a tourist trip to [Ongoing planning of further stages of a trip]	2. Please indicate your opinion: I use social media during a tourist trip to [Obtaining information about the place of stay]	2. Please indicate your opinion: I use social media during a tourist trip to [Commenting on events taking place in the place of stay]	2. Please indicate your opinion: I use social media during a tourist trip to [Making contact with the local community]	2. Please indicate your opinion: I use social media during a tourist trip to [Obtaining information about current events (cultural, entertainment, etc.)]	2. Please indicate your opinion: I use social media during a tourist trip to [Current sharing experiences from a tourist trip]	2. Please indicate your opinion: I use social media during a tourist trip to [Making contact with other tourists]	3. Please indicate your opinion: I use social media during a tourist trip to [Obtaining information about current difficulties (e.g., traffic jams, accidents)]	3. Please indicate your opinion: I use social media to share the experience of a travel trip by [Sending e-mail /text messages]	3. Please indicate your opinion: I use social media to share the experience of a travel trip by [Photo/video album for friends]	3. Please indicate your opinion: I use social media to share the experience of a travel trip by [Public photo/video album]	3. Please indicate your opinion: I use social media to share the experience of a travel trip by [Writing reviews]	3. Please indicate your opinion: I use social media to share the experience of a travel trip by [Posting statements and photos in social groups/ forums]	3. Please indicate your opinion: I use social media to share the experience of a travel trip by [Posting on blogs]
r_1	41-56	Woman	Secondary	Over 6 years	I don't have any profile	"friends only" privacy settings	"friends only" privacy settings	I don't have any profile	I don't have any profile	Agree	Agree	Disagree	Disagree	Agree	Agree	Disagree	Agree	#N/A	#N/A	#N/A	#N/A	#N/A	#N/A
r_2	41-56	Woman	Secondary	Over 6 years	I don't have any profile	"friends only" privacy settings	"friends only" privacy settings	I don't know what my privacy settings are	I don't have any profile	Agree	Agree	Disagree	I have no opinion	Agree	Agree	Disagree	Agree	Disagree	Disagree	Disagree	Agree	Disagree	Disagree
r_3	41-56	Woman	Secondary	Over 6 years	I don't know what my privacy settings are	"friends only" privacy settings	"friends only" privacy settings	I don't have any profile	I don't have any profile	Agree	Disagree	Disagree	Disagree	Agree	Disagree	Disagree	Agree	Agree	I have no opinion	Strongly disagree	Disagree	I have no opinion	Disagree
r_4	41-56	Man	Basic/Junior high	Up to 2 years	I don't have any profile	I adjust my privacy settings	I don't know what my privacy settings are	I don't have any profile	I don't have any profile	Disagree	Disagree	Disagree	Disagree	Agree	Disagree	Disagree	Disagree	Agree	Disagree	Disagree	Disagree	Disagree	Disagree
r_5	41-56	Woman	Secondary	Over 6 years	I don't have any profile	"friends only" privacy settings	I don't know what my privacy settings are	I don't have any profile	I don't have any profile	Agree	Agree	Strongly disagree	Strongly disagree	Agree	I have no opinion	Strongly disagree	Strongly disagree	Strongly disagree	Agree	Strongly disagree	Strongly disagree	Strongly disagree	Strongly disagree
r_6	41-56	Woman	Secondary	Over 6 years	I don't have any profile	I adjust my privacy settings	I adjust my privacy settings	I don't have any profile	I don't have any profile	Strongly agree	Strongly agree	Strongly disagree	Disagree	Strongly agree	Strongly disagree	Strongly disagree	Agree	Strongly disagree	Strongly disagree	Strongly disagree	Strongly disagree	Strongly disagree	Strongly disagree
r_7	41-56	Man	Higher I	I don’t remember	I don't have any profile	public profile	public profile	I don't have any profile	I don't have any profile	Disagree	Agree	Strongly disagree	Strongly disagree	Agree	I have no opinion	Strongly disagree	Strongly agree	Strongly agree	Agree	Agree	Strongly disagree	I have no opinion	Strongly disagree
r_8	41-56	Man	Secondary	Over 6 years	public profile	I adjust my privacy settings	I adjust my privacy settings	I adjust my privacy settings	I don't have any profile	Agree	Agree	I have no opinion	Disagree	Agree	Disagree	Agree	Disagree	Agree	Disagree	Disagree	Agree	Disagree	Disagree
r_9	41-56	Man	Secondary	From 4 to 6 years	"friends only" privacy settings	"friends only" privacy settings	"friends only" privacy settings	I don't have any profile	I don't have any profile	Agree	Agree	Strongly disagree	Strongly disagree	Strongly disagree	Agree	Strongly disagree	Agree	Strongly disagree	Strongly disagree	Strongly disagree	Strongly disagree	Strongly disagree	Strongly disagree
r_10	41-56	Woman	Secondary	Over 6 years	I don't have any profile	"friends only" privacy settings	"friends only" privacy settings	I don't have any profile	I don't have any profile	Agree	Strongly agree	I have no opinion	Disagree	Agree	Disagree	Disagree	Agree	Strongly agree	Disagree	Disagree	Disagree	Disagree	Disagree
r_11	41-56	Woman	Higher I	Over 6 years	I don't have any profile	I adjust my privacy settings	"friends only" privacy settings	"friends only" privacy settings	I don't have any profile	Agree	Agree	Agree	I have no opinion	Agree	Strongly agree	Disagree	Agree	Agree	Strongly agree	Strongly disagree	Strongly disagree	Strongly disagree	Strongly disagree
r_12	41-56	Man	Higher I	Over 6 years	I don't have any profile	"friends only" privacy settings	I adjust my privacy settings	public profile	public profile	I have no opinion	I have no opinion	I have no opinion	Agree	Agree	Agree	I have no opinion	Agree	Agree	Agree	Strongly disagree	Strongly agree	Agree	Strongly disagree
r_13	41-56	Man	Higher I	Over 6 years	"friends only" privacy settings	"friends only" privacy settings	"friends only" privacy settings	"friends only" privacy settings	I adjust my privacy settings	Agree	Agree	Agree	I have no opinion	Agree	I have no opinion	Disagree	Agree	Agree	Agree	Agree	Strongly agree	Strongly agree	Agree
r_14	41-56	Woman	Higher I	I don’t remember	I don't have any profile	"friends only" privacy settings	I adjust my privacy settings	I don't have any profile	I don't have any profile	I have no opinion	Strongly agree	Strongly disagree	Strongly agree	Strongly agree	Strongly disagree	Strongly disagree	Strongly agree	Strongly disagree	Strongly disagree	Strongly disagree	Strongly disagree	Strongly disagree	Strongly disagree
r_15	41-56	Man	Higher I	Over 6 years	I don't have any profile	public profile	I don't have any profile	I don't know what my privacy settings are	I don't have any profile	Agree	Agree	Agree	I have no opinion	Agree	Agree	Agree	Agree	Disagree	Disagree	Disagree	Disagree	#N/A	Disagree
r_16	41-56	Man	Higher I	Over 6 years	I don't have any profile	"friends only" privacy settings	"friends only" privacy settings	I adjust my privacy settings	I adjust my privacy settings	Agree	Agree	Disagree	Strongly agree	Agree	Disagree	Agree	Agree	Strongly disagree	Strongly disagree	Strongly disagree	Agree	Agree	Strongly disagree
r_17	41-56	Woman	Secondary	Over 6 years	I don't have any profile	public profile	I don't have any profile	I don't have any profile	I don't have any profile	Agree	Agree	Agree	Disagree	Agree	Agree	Agree	Agree	Agree	Agree	Disagree	I have no opinion	Agree	Disagree
r_18	41-56	Woman	Secondary	Over 6 years	I don't have any profile	I adjust my privacy settings	I don't have any profile	public profile	I don't have any profile	Strongly agree	Strongly agree	I have no opinion	I have no opinion	Agree	I have no opinion	I have no opinion	Strongly agree	I have no opinion	I have no opinion	I have no opinion	I have no opinion	I have no opinion	I have no opinion
r_19	41-56	Woman	Secondary	Over 6 years	I don't have any profile	I adjust my privacy settings	I adjust my privacy settings	I don't have any profile	I don't know what my privacy settings are	Strongly agree	Strongly agree	Strongly agree	Strongly agree	Strongly agree	Strongly agree	Strongly agree	Strongly agree	Strongly agree	Strongly agree	Strongly disagree	Strongly disagree	Strongly disagree	Strongly disagree
r_20	41-56	Woman	Secondary	I don’t remember	I adjust my privacy settings	"friends only" privacy settings	I adjust my privacy settings	I don't have any profile	I don't have any profile	Agree	Agree	Disagree	I have no opinion	Agree	Disagree	Disagree	Agree	Disagree	Agree	Disagree	Disagree	Disagree	Disagree
r_21	41-56	Man	Secondary	From 4 to 6 years	"friends only" privacy settings	"friends only" privacy settings	"friends only" privacy settings	I don't have any profile	I don't have any profile	Disagree	Disagree	Disagree	Disagree	Agree	Disagree	Disagree	Agree	Strongly disagree	Strongly disagree	Strongly disagree	Strongly disagree	Strongly disagree	Strongly disagree
r_22	41-56	Man	Higher I	Over 6 years	I don't have any profile	"friends only" privacy settings	I adjust my privacy settings	I don't know what my privacy settings are	I don't know what my privacy settings are	Agree	Strongly agree	Disagree	Disagree	Agree	Strongly agree	Disagree	Strongly agree	Agree	Strongly agree	Strongly agree	Strongly disagree	Strongly disagree	Agree
r_23	41-56	Woman	Higher I	Over 6 years	I don't have any profile	"friends only" privacy settings	I adjust my privacy settings	I don't have any profile	I don't have any profile	Agree	Strongly agree	I have no opinion	Agree	Agree	Agree	I have no opinion	Agree	Strongly agree	Strongly disagree	Strongly disagree	Agree	I have no opinion	Strongly disagree
r_24	41-56	Man	Higher I	Over 6 years	I don't have any profile	public profile	I don't know what my privacy settings are	I don't know what my privacy settings are	I don't have any profile	I have no opinion	Agree	Strongly disagree	Disagree	Agree	Disagree	Disagree	Agree	I have no opinion	Strongly agree	Disagree	Agree	Disagree	Disagree
r_25	41-56	Man	Secondary	Over 6 years	I don't have any profile	public profile	I adjust my privacy settings	I don't have any profile	I don't have any profile	Agree	Agree	Agree	Strongly agree	Agree	I have no opinion	I have no opinion	Agree	I have no opinion	Agree	Disagree	Disagree	I have no opinion	I have no opinion
r_26	41-56	Man	Secondary	Over 6 years	I don't have any profile	public profile	I adjust my privacy settings	I don't have any profile	I don't have any profile	Strongly disagree	Strongly agree	Agree	Disagree	Strongly agree	Agree	I have no opinion	Strongly agree	Disagree	Agree	Agree	Disagree	Disagree	Strongly disagree
r_27	41-56	Woman	Higher I	Over 6 years	I don't have any profile	I adjust my privacy settings	public profile	I adjust my privacy settings	I don't have any profile	Agree	Agree	I have no opinion	Disagree	Agree	I have no opinion	I have no opinion	Agree	I have no opinion	Agree	Agree	I have no opinion	Agree	Disagree
r_28	41-56	Woman	Secondary	Over 6 years	"friends only" privacy settings	public profile	"friends only" privacy settings	I don't know what my privacy settings are	I don't have any profile	Strongly agree	Strongly agree	Agree	Strongly agree	Strongly agree	Strongly agree	Strongly agree	Agree	Agree	Strongly agree	Agree	I have no opinion	Strongly agree	Strongly agree
r_29	41-56	Man	Secondary	Over 6 years	public profile	public profile	public profile	public profile	I don't have any profile	Agree	Agree	Disagree	Disagree	I have no opinion	Agree	Disagree	Agree	Agree	Agree	Disagree	Disagree	Agree	Disagree
r_30	41-56	Woman	Secondary	Over 6 years	I don't have any profile	I adjust my privacy settings	I don't know what my privacy settings are	I don't have any profile	I don't have any profile	Agree	Agree	Disagree	Disagree	Agree	Disagree	Strongly disagree	I have no opinion	Disagree	Disagree	Disagree	Disagree	Disagree	Disagree
r_31	41-56	Man	Secondary	Over 6 years	"friends only" privacy settings	"friends only" privacy settings	I don't have any profile	I don't have any profile	I don't have any profile	Agree	Agree	I have no opinion	Disagree	Agree	Disagree	I have no opinion	Agree	Agree	Disagree	Disagree	Disagree	Disagree	Disagree
r_32	41-56	Woman	Higher I	Over 6 years	public profile	"friends only" privacy settings	I adjust my privacy settings	I don't have any profile	I don't have any profile	Agree	Agree	Agree	I have no opinion	Strongly agree	Strongly agree	Disagree	Agree	Agree	Strongly agree	Agree	Agree	Agree	Agree
r_33	41-56	Man	Secondary	Over 6 years	I don't have any profile	I adjust my privacy settings	public profile	I don't have any profile	I don't have any profile	Strongly agree	Agree	I have no opinion	I have no opinion	I have no opinion	I have no opinion	I have no opinion	Agree	I have no opinion	I have no opinion	I have no opinion	I have no opinion	I have no opinion	I have no opinion
r_34	41-56	Woman	Higher I	I don’t remember	I don't have any profile	"friends only" privacy settings	public profile	public profile	I don't have any profile	#N/A	Agree	Agree	Strongly disagree	Strongly agree	Strongly agree	Strongly disagree	Strongly agree	Strongly agree	Agree	I have no opinion	I have no opinion	Strongly agree	Agree
r_35	41-56	Woman	Secondary	Over 6 years	I don't have any profile	"friends only" privacy settings	"friends only" privacy settings	I don't have any profile	I don't have any profile	Strongly agree	Strongly agree	Strongly disagree	Strongly disagree	I have no opinion	Agree	Strongly disagree	Strongly agree	Disagree	Disagree	Disagree	Strongly disagree	Strongly disagree	Strongly disagree
r_36	41-56	Woman	Secondary	From 4 to 6 years	I don't have any profile	"friends only" privacy settings	"friends only" privacy settings	I don't have any profile	I don't have any profile	Agree	Agree	Agree	I have no opinion	Agree	Agree	I have no opinion	Strongly agree	Strongly agree	Strongly agree	Strongly agree	I have no opinion	Agree	Agree
r_37	41-56	Woman	Secondary	Over 6 years	I don't have any profile	I adjust my privacy settings	public profile	I don't have any profile	I don't have any profile	Agree	Agree	Strongly disagree	I have no opinion	Agree	Agree	I have no opinion	Agree	Agree	Agree	Strongly disagree	Strongly disagree	Agree	Disagree
r_38	41-56	Woman	Secondary	Over 6 years	I don't have any profile	"friends only" privacy settings	I don't have any profile	I don't have any profile	I don't have any profile	Strongly agree	Strongly agree	Strongly disagree	Strongly disagree	Agree	Disagree	Strongly disagree	I have no opinion	Agree	Agree	Strongly disagree	Strongly disagree	Strongly disagree	Strongly disagree
r_39	41-56	Woman	Secondary	Over 6 years	I don't have any profile	"friends only" privacy settings	I adjust my privacy settings	I don't know what my privacy settings are	I don't have any profile	Strongly agree	Strongly agree	Agree	Strongly disagree	I have no opinion	I have no opinion	Strongly disagree	Strongly agree	I have no opinion	Agree	Strongly disagree	Agree	I have no opinion	Strongly disagree
r_40	41-56	Man	Higher I	Over 6 years	"friends only" privacy settings	"friends only" privacy settings	"friends only" privacy settings	"friends only" privacy settings	"friends only" privacy settings	Agree	Agree	Agree	Agree	Agree	Agree	Agree	Agree	Agree	Agree	I have no opinion	I have no opinion	I have no opinion	I have no opinion
r_41	41-56	Woman	Higher I	From 4 to 6 years	I don't have any profile	"friends only" privacy settings	I don't have any profile	I adjust my privacy settings	I adjust my privacy settings	Strongly agree	Strongly agree	I have no opinion	Agree	Agree	I have no opinion	Agree	Agree	I have no opinion	I have no opinion	I have no opinion	I have no opinion	I have no opinion	I have no opinion
r_42	41-56	Woman	Higher I	Over 6 years	I don't have any profile	public profile	public profile	public profile	I don't have any profile	Strongly agree	Strongly agree	I have no opinion	I have no opinion	Agree	Strongly agree	Agree	Strongly agree	Agree	Strongly agree	I have no opinion	Agree	Strongly agree	Disagree
r_43	41-56	Woman	Higher I	Over 6 years	I don't have any profile	"friends only" privacy settings	I don't have any profile	I don't have any profile	I don't have any profile	Agree	Agree	Agree	I have no opinion	Agree	Agree	I have no opinion	Agree	Agree	Agree	Strongly disagree	I have no opinion	I have no opinion	Strongly disagree
r_44	41-56	Woman	Higher I	Over 6 years	I don't have any profile	"friends only" privacy settings	I adjust my privacy settings	I don't have any profile	I don't have any profile	Agree	Agree	Disagree	I have no opinion	Agree	I have no opinion	Agree	I have no opinion	Agree	Disagree	Disagree	Agree	I have no opinion	I have no opinion
r_45	41-56	Man	Secondary	Over 6 years	I don't have any profile	I adjust my privacy settings	I adjust my privacy settings	I don't have any profile	I don't have any profile	Strongly disagree	I have no opinion	Strongly disagree	Strongly disagree	Agree	Agree	Strongly disagree	Agree	Strongly disagree	I have no opinion	Strongly disagree	Strongly disagree	Strongly disagree	Strongly disagree
r_46	41-56	Woman	Secondary	Over 6 years	I don't have any profile	"friends only" privacy settings	I adjust my privacy settings	I don't have any profile	I don't have any profile	I have no opinion	Agree	Disagree	I have no opinion	Agree	Agree	Disagree	Agree	Disagree	Agree	Strongly disagree	Strongly disagree	Strongly disagree	Strongly disagree
r_47	41-56	Man	Secondary	Over 6 years	I don't have any profile	I adjust my privacy settings	I adjust my privacy settings	I don't have any profile	I don't have any profile	Strongly agree	Strongly agree	Agree	Disagree	Strongly agree	Agree	I have no opinion	Strongly agree	Agree	I have no opinion	Agree	Disagree	Agree	Agree
r_48	41-56	Woman	Secondary	Over 6 years	public profile	"friends only" privacy settings	public profile	I don't have any profile	I don't have any profile	Agree	Agree	Disagree	Disagree	Agree	Disagree	Disagree	Agree	Agree	Agree	Disagree	Disagree	Agree	Disagree
r_49	41-56	Woman	Secondary	Over 6 years	I don't have any profile	"friends only" privacy settings	"friends only" privacy settings	I don't have any profile	I don't have any profile	Agree	Agree	I have no opinion	Disagree	Agree	Agree	I have no opinion	Agree	Disagree	Agree	Strongly disagree	Disagree	Agree	Strongly disagree
r_50	41-56	Man	Secondary	From 4 to 6 years	"friends only" privacy settings	I adjust my privacy settings	I adjust my privacy settings	I adjust my privacy settings	I adjust my privacy settings	I have no opinion	Agree	Agree	Agree	Strongly agree	I have no opinion	Disagree	Strongly agree	Disagree	Agree	Agree	Agree	I have no opinion	I have no opinion
r_51	41-56	Man	Secondary	Over 6 years	I adjust my privacy settings	I adjust my privacy settings	I adjust my privacy settings	I don't have any profile	I don't have any profile	Agree	I have no opinion	Disagree	Disagree	I have no opinion	I have no opinion	Disagree	I have no opinion	Disagree	Disagree	Disagree	Disagree	Agree	Disagree
r_52	41-56	Man	Secondary	Over 6 years	I don't have any profile	"friends only" privacy settings	I adjust my privacy settings	I don't know what my privacy settings are	I don't have any profile	Disagree	I have no opinion	Disagree	Disagree	Agree	I have no opinion	Agree	Agree	Agree	Agree	Disagree	Agree	Agree	Disagree
r_53	to 26	Woman	Higher I	From 2 to 4 years	I adjust my privacy settings	public profile	public profile	I adjust my privacy settings	I adjust my privacy settings	I have no opinion	Agree	Agree	Agree	I have no opinion	Agree	Agree	Agree	Agree	Agree	Disagree	Agree	Agree	I have no opinion
r_54	above 57	Woman	Higher I	From 2 to 4 years	I don't have any profile	I don't have any profile	I don't have any profile	I don't have any profile	I don't have any profile	Strongly disagree	Strongly disagree	Strongly disagree	Strongly disagree	Strongly disagree	Strongly disagree	Strongly disagree	Strongly disagree	Strongly disagree	Strongly disagree	Strongly disagree	Strongly disagree	Strongly disagree	Strongly disagree
r_55	above 57	Man	Higher I	Over 6 years	#N/A	public profile	public profile	#N/A	public profile	Agree	Agree	Disagree	Strongly agree	Agree	I have no opinion	Agree	Strongly agree	Agree	Agree	Agree	Disagree	Agree	Agree
r_56	above 57	Woman	Secondary	Over 6 years	I don't have any profile	public profile	I don't have any profile	I don't have any profile	I don't have any profile	Agree	Agree	Agree	Agree	Strongly agree	Agree	Agree	Strongly agree	Agree	I have no opinion	I have no opinion	I have no opinion	Agree	Agree
r_57	above 57	Man	Higher II	Over 6 years	I don't know what my privacy settings are	I don't know what my privacy settings are	I don't know what my privacy settings are	I don't know what my privacy settings are	I don't know what my privacy settings are	I have no opinion	Agree	Strongly agree	I have no opinion	Strongly agree	Agree	I have no opinion	Agree	Agree	Disagree	Disagree	Agree	Disagree	Strongly disagree
r_58	above 57	Man	Secondary	Up to 2 years	I don't have any profile	I don't know what my privacy settings are	I don't have any profile	I don't have any profile	I don't have any profile	Disagree	Agree	Agree	Disagree	#N/A	Agree	Disagree	Agree	Strongly agree	Disagree	Disagree	Agree	Agree	Disagree
r_59	above 57	Woman	Secondary	Never used	I don't have any profile	I don't have any profile	I don't have any profile	I don't have any profile	I don't have any profile	Strongly disagree	Strongly disagree	Strongly disagree	Strongly disagree	Strongly disagree	Strongly disagree	Strongly disagree	Strongly disagree	Strongly disagree	Strongly disagree	Strongly disagree	Strongly disagree	Strongly disagree	Strongly disagree
r_60	above 57	Man	Higher II	From 4 to 6 years	I don't have any profile	"friends only" privacy settings	I don't have any profile	I don't have any profile	I don't have any profile	Agree	Agree	Agree	Disagree	Agree	Agree	Agree	Agree	Agree	Strongly disagree	Strongly disagree	Agree	Strongly disagree	Strongly disagree
r_61	above 57	Woman	Secondary	From 2 to 4 years	I don't have any profile	I don't have any profile	I don't have any profile	I don't have any profile	I don't have any profile	Strongly disagree	Strongly disagree	Strongly disagree	Strongly disagree	Strongly disagree	Strongly disagree	Strongly disagree	Strongly disagree	Strongly agree	Strongly disagree	Strongly disagree	Strongly disagree	Strongly disagree	Strongly disagree
r_62	above 57	Man	Secondary	Never used	I don't have any profile	I don't have any profile	I don't have any profile	I don't have any profile	I don't have any profile	Strongly disagree	Strongly disagree	Strongly disagree	Strongly disagree	Strongly disagree	Strongly disagree	Strongly disagree	Strongly disagree	Strongly disagree	Strongly disagree	Strongly disagree	Strongly disagree	Strongly disagree	Strongly disagree
r_63	to 26	Man	Secondary	Never used	I don't have any profile	I don't have any profile	#N/A	I don't have any profile	I don't have any profile	Strongly disagree	Strongly disagree	Strongly disagree	Strongly disagree	Strongly disagree	Strongly disagree	Strongly disagree	Strongly disagree	Strongly disagree	Strongly disagree	Strongly disagree	Strongly disagree	Strongly disagree	Strongly disagree
r_64	above 57	Man	Higher II	Over 6 years	I don't have any profile	I adjust my privacy settings	public profile	I don't have any profile	I don't have any profile	Agree	Agree	Agree	I have no opinion	Agree	Agree	Strongly agree	Agree	Strongly agree	Strongly agree	I have no opinion	I have no opinion	Strongly agree	I have no opinion
r_65	to 26	Man	Secondary	Over 6 years	I adjust my privacy settings	public profile	I adjust my privacy settings	I adjust my privacy settings	I don't know what my privacy settings are	I have no opinion	Agree	Agree	Agree	Agree	I have no opinion	Agree	Agree	Agree	Agree	I have no opinion	I have no opinion	Agree	Agree
r_66	above 57	Woman	Higher I	Over 6 years	#N/A	"friends only" privacy settings	"friends only" privacy settings	#N/A	#N/A	Agree	Strongly agree	Agree	Agree	Strongly agree	Strongly agree	Strongly agree	Strongly agree	Strongly agree	Strongly agree	Agree	Strongly agree	Strongly agree	I have no opinion
r_67	above 57	Woman	Higher II	Over 6 years	I don't have any profile	"friends only" privacy settings	I don't know what my privacy settings are	I don't have any profile	public profile	Strongly agree	Strongly agree	I have no opinion	I have no opinion	Strongly agree	I have no opinion	Disagree	Strongly agree	Disagree	Disagree	Strongly disagree	Agree	Strongly disagree	Strongly disagree
r_68	above 57	Man	Higher II	Over 6 years	I don't have any profile	I don't know what my privacy settings are	I don't know what my privacy settings are	I don't have any profile	I don't have any profile	Strongly agree	Strongly agree	Agree	I have no opinion	I have no opinion	Strongly agree	Strongly agree	Agree	Agree	Strongly agree	I have no opinion	I have no opinion	Strongly disagree	Strongly disagree
r_69	above 57	Man	Higher II	From 2 to 4 years	I don't have any profile	I don't know what my privacy settings are	I don't know what my privacy settings are	I don't know what my privacy settings are	I don't have any profile	Strongly disagree	I have no opinion	Strongly disagree	Strongly disagree	Agree	Agree	Strongly disagree	Strongly disagree	Strongly agree	Disagree	Disagree	Disagree	Agree	Disagree
r_70	above 57	Woman	Higher II	I don’t remember	I don't have any profile	public profile	"friends only" privacy settings	I don't have any profile	"friends only" privacy settings	Disagree	Agree	Disagree	I have no opinion	I have no opinion	I have no opinion	I have no opinion	I have no opinion	Disagree	Disagree	Strongly disagree	Strongly disagree	Disagree	Strongly disagree
r_71	above 57	Woman	Higher II	Over 6 years	#N/A	"friends only" privacy settings	I don't have any profile	I don't have any profile	I don't have any profile	Agree	Agree	Agree	I have no opinion	Strongly agree	Agree	Agree	Agree	Strongly agree	Strongly agree	Disagree	Agree	Disagree	I have no opinion
r_72	above 57	Woman	Higher II	Over 6 years	I adjust my privacy settings	"friends only" privacy settings	I adjust my privacy settings	I adjust my privacy settings	"friends only" privacy settings	I have no opinion	Disagree	Disagree	Disagree	Strongly agree	Disagree	Disagree	Disagree	Strongly disagree	Strongly disagree	Strongly disagree	Agree	Agree	Disagree
r_73	above 57	Woman	Secondary	Over 6 years	#N/A	"friends only" privacy settings	#N/A	#N/A	#N/A	Agree	Agree	#N/A	#N/A	#N/A	#N/A	#N/A	#N/A	Agree	Agree	Agree	Agree	Agree	Agree
r_74	above 57	Man	Higher II	Over 6 years	I don't have any profile	I adjust my privacy settings	I don't know what my privacy settings are	I adjust my privacy settings	I don't have any profile	Disagree	Agree	I have no opinion	Disagree	Agree	I have no opinion	I have no opinion	Disagree	Disagree	Agree	Disagree	I have no opinion	Agree	I have no opinion
r_75	above 57	Woman	Higher II	I don’t remember	I don't have any profile	I don't have any profile	I don't have any profile	I don't have any profile	I don't have any profile	Agree	Agree	Agree	Agree	Agree	Agree	Agree	Agree	Agree	Agree	I have no opinion	I have no opinion	I have no opinion	I have no opinion
r_76	above 57	Woman	Higher I	Over 6 years	I don't have any profile	I don't know what my privacy settings are	public profile	public profile	public profile	I have no opinion	Agree	I have no opinion	Strongly disagree	Strongly agree	Agree	Strongly agree	Strongly agree	Strongly agree	Agree	Disagree	Strongly agree	Strongly agree	Strongly agree
r_77	above 57	Woman	Secondary	Over 6 years	I don't have any profile	I don't know what my privacy settings are	#N/A	#N/A	#N/A	Agree	Strongly agree	Agree	I have no opinion	Strongly agree	Agree	Agree	Agree	Strongly agree	I have no opinion	Strongly disagree	Strongly disagree	Strongly disagree	Strongly disagree
r_78	above 57	Woman	Secondary	Up to 2 years	I don't have any profile	I don't know what my privacy settings are	I don't know what my privacy settings are	I don't have any profile	I don't have any profile	Disagree	Disagree	Disagree	Disagree	Disagree	Disagree	Disagree	Disagree	Agree	Disagree	Disagree	Disagree	Agree	Disagree
r_79	to 26	Man	Higher I	Over 6 years	I don't have any profile	"friends only" privacy settings	"friends only" privacy settings	I don't have any profile	I don't have any profile	I have no opinion	Agree	Strongly disagree	Disagree	Agree	Strongly disagree	Strongly disagree	Strongly disagree	Strongly disagree	Agree	Strongly disagree	Disagree	I have no opinion	Strongly disagree
r_80	to 26	Man	Higher I	Over 6 years	I don't have any profile	"friends only" privacy settings	"friends only" privacy settings	I don't have any profile	I don't have any profile	I have no opinion	Agree	Strongly disagree	Disagree	Agree	Strongly disagree	Strongly disagree	Strongly disagree	Strongly disagree	Agree	Strongly disagree	Disagree	I have no opinion	Strongly disagree
r_81	above 57	Woman	Postgraduate	Over 6 years	I don't have any profile	I don't know what my privacy settings are	I don't have any profile	I don't have any profile	I don't have any profile	Disagree	Agree	Disagree	Disagree	Disagree	Disagree	Disagree	Disagree	Agree	Disagree	Disagree	Disagree	Disagree	Disagree
r_82	above 57	Man	Secondary	I don’t remember	I don't have any profile	"friends only" privacy settings	I adjust my privacy settings	I don't have any profile	I don't have any profile	Agree	Agree	I have no opinion	Agree	Agree	Agree	Agree	Agree	Strongly disagree	Strongly disagree	Strongly disagree	Strongly disagree	Strongly disagree	Strongly disagree
r_83	above 57	Woman	Secondary	From 4 to 6 years	I don't have any profile	"friends only" privacy settings	I don't have any profile	I don't have any profile	I don't have any profile	Agree	Agree	I have no opinion	Agree	Agree	Agree	Agree	Agree	Agree	Strongly disagree	Strongly disagree	Disagree	Agree	Agree
r_84	to 26	Man	Secondary	I don’t remember	I don't have any profile	public profile	I don't know what my privacy settings are	I adjust my privacy settings	I don't have any profile	Agree	Agree	Agree	Agree	Agree	Agree	Agree	Agree	Agree	Agree	Agree	Agree	Agree	I have no opinion
r_85	to 26	Man	Secondary	Over 6 years	I don't have any profile	I adjust my privacy settings	I adjust my privacy settings	I don't have any profile	I don't have any profile	Strongly disagree	Strongly disagree	Strongly disagree	Strongly disagree	Strongly disagree	Strongly disagree	Strongly disagree	Strongly disagree	Strongly disagree	Strongly disagree	I have no opinion	Strongly disagree	Agree	Strongly disagree
r_86	to 26	Woman	Higher II	Over 6 years	I don't have any profile	"friends only" privacy settings	I don't know what my privacy settings are	I don't have any profile	I don't have any profile	Agree	Agree	Agree	I have no opinion	I have no opinion	Agree	Agree	Agree	Disagree	Agree	I have no opinion	I have no opinion	Agree	I have no opinion
r_87	to 26	Man	Higher II	Over 6 years	"friends only" privacy settings	"friends only" privacy settings	"friends only" privacy settings	"friends only" privacy settings	"friends only" privacy settings	Agree	Agree	Agree	Agree	Agree	I have no opinion	I have no opinion	I have no opinion	Strongly disagree	Strongly agree	Agree	Strongly disagree	Strongly agree	Strongly agree
r_88	27-40	Man	Higher I	Over 6 years	I don't have any profile	I adjust my privacy settings	public profile	"friends only" privacy settings	"friends only" privacy settings	Strongly agree	Strongly agree	I have no opinion	Strongly agree	Strongly agree	Strongly disagree	Strongly disagree	Strongly agree	Agree	Strongly agree	Strongly disagree	Strongly agree	Disagree	Strongly disagree
r_89	above 57	Man	Higher II	Over 6 years	#N/A	#N/A	#N/A	#N/A	#N/A	Agree	Agree	Disagree	Disagree	Agree	Disagree	Disagree	Disagree	Disagree	Disagree	Disagree	I have no opinion	Strongly disagree	Strongly disagree
r_90	27-40	Man	Higher II	Over 6 years	I don't have any profile	"friends only" privacy settings	"friends only" privacy settings	I don't have any profile	I don't have any profile	Agree	Agree	Agree	Agree	Agree	Agree	Agree	Agree	I have no opinion	I have no opinion	Agree	Agree	Agree	Agree
r_91	to 26	Woman	Higher II	Over 6 years	I don't have any profile	public profile	I don't have any profile	I don't have any profile	I don't have any profile	Agree	Agree	Agree	Agree	Strongly agree	Strongly agree	Strongly agree	Strongly agree	Disagree	Strongly agree	Strongly agree	I have no opinion	Strongly agree	Strongly disagree
r_92	above 57	Woman	Higher II	Over 6 years	"friends only" privacy settings	"friends only" privacy settings	"friends only" privacy settings	"friends only" privacy settings	"friends only" privacy settings	Strongly agree	Strongly agree	Agree	Strongly agree	Strongly agree	Agree	Agree	Strongly agree	Strongly agree	I have no opinion	I have no opinion	Agree	Agree	Agree
r_93	above 57	Man	Vocational	I don’t remember	"friends only" privacy settings	"friends only" privacy settings	I don't have any profile	I adjust my privacy settings	I don't have any profile	I have no opinion	Agree	I have no opinion	Agree	I have no opinion	Agree	I have no opinion	Agree	I have no opinion	Agree	Agree	I have no opinion	Strongly disagree	Disagree
r_94	above 57	Woman	Higher II	Over 6 years	I don't have any profile	"friends only" privacy settings	I don't have any profile	I don't have any profile	I don't have any profile	I have no opinion	Agree	I have no opinion	I have no opinion	Agree	Agree	I have no opinion	Agree	I have no opinion	Agree	Agree	I have no opinion	Agree	Disagree
r_95	above 57	Woman	Higher II	Over 6 years	"friends only" privacy settings	I adjust my privacy settings	I don't have any profile	I don't have any profile	I don't have any profile	Agree	Agree	Agree	Agree	Agree	Agree	Agree	Agree	Agree	Agree	Agree	I have no opinion	Agree	Agree
r_96	above 57	Woman	Secondary	Up to 2 years	I don't have any profile	I don't know what my privacy settings are	I don't have any profile	I don't have any profile	I don't have any profile	Disagree	Disagree	Agree	Agree	Strongly agree	Strongly agree	Strongly disagree	I have no opinion	Strongly agree	Disagree	Disagree	Disagree	Disagree	Disagree
r_97	above 57	Woman	Secondary	Up to 2 years	I don't know what my privacy settings are	I adjust my privacy settings	I don't have any profile	I don't have any profile	I don't have any profile	Agree	Strongly disagree	Strongly disagree	Strongly disagree	Strongly disagree	Strongly disagree	Strongly disagree	Strongly agree	Strongly agree	Agree	Strongly disagree	Strongly disagree	Agree	Strongly disagree
r_98	above 57	Man	PhD	Over 6 years	I don't have any profile	"friends only" privacy settings	I don't have any profile	I adjust my privacy settings	I don't have any profile	Agree	Agree	Disagree	Disagree	Agree	Disagree	Disagree	Strongly agree	Agree	Agree	Disagree	Agree	Agree	Strongly disagree
r_99	above 57	Man	Higher II	Over 6 years	I don't have any profile	I don't know what my privacy settings are	I don't have any profile	I don't have any profile	I don't have any profile	Disagree	I have no opinion	I have no opinion	Disagree	I have no opinion	Disagree	Disagree	Disagree	Disagree	Disagree	Disagree	Disagree	Disagree	Disagree
r_100	above 57	Woman	Secondary	Over 6 years	I don't have any profile	"friends only" privacy settings	I adjust my privacy settings	I don't have any profile	I don't have any profile	Strongly disagree	I have no opinion	Strongly disagree	Strongly disagree	Agree	Strongly disagree	Strongly disagree	Strongly disagree	Strongly disagree	Agree	Strongly disagree	Strongly disagree	Agree	Strongly disagree
r_101	above 57	Man	Secondary	Up to 2 years	I don't have any profile	I don't have any profile	I adjust my privacy settings	I don't have any profile	I don't have any profile	Strongly disagree	Strongly disagree	Strongly disagree	Strongly disagree	Strongly disagree	Strongly disagree	Strongly disagree	Strongly disagree	Agree	Strongly disagree	Strongly disagree	Strongly disagree	Strongly disagree	Strongly disagree
r_102	to 26	Man	Higher II	Over 6 years	"friends only" privacy settings	"friends only" privacy settings	"friends only" privacy settings	"friends only" privacy settings	"friends only" privacy settings	Strongly agree	Strongly agree	Strongly agree	Strongly agree	Strongly agree	Strongly agree	Strongly agree	#N/A	Strongly agree	Strongly agree	Strongly agree	Strongly agree	Strongly agree	#N/A
r_103	27-40	Woman	Secondary	Over 6 years	I don't have any profile	I adjust my privacy settings	I don't have any profile	I don't have any profile	I don't have any profile	Agree	Agree	Agree	I have no opinion	Agree	Agree	I have no opinion	Strongly agree	Disagree	Agree	Strongly disagree	I have no opinion	Agree	Strongly disagree
r_104	to 26	Woman	PhD	From 2 to 4 years	I don't have any profile	"friends only" privacy settings	I don't know what my privacy settings are	I don't have any profile	I don't have any profile	Strongly disagree	Agree	Strongly disagree	Strongly disagree	Strongly agree	Strongly disagree	Strongly disagree	Strongly agree	Strongly agree	Strongly disagree	Strongly disagree	Strongly disagree	Strongly disagree	Strongly disagree
r_105	27-40	Man	Higher II	Over 6 years	I don't have any profile	I adjust my privacy settings	I adjust my privacy settings	I don't have any profile	I don't have any profile	Agree	Strongly agree	Strongly disagree	Strongly disagree	Agree	Strongly disagree	Strongly disagree	Strongly disagree	Strongly disagree	Strongly disagree	Strongly disagree	Disagree	Strongly disagree	Strongly disagree
r_106	27-40	Man	PhD	Over 6 years	I don't have any profile	"friends only" privacy settings	"friends only" privacy settings	I don't know what my privacy settings are	I don't know what my privacy settings are	Disagree	Disagree	Agree	Disagree	Agree	Strongly agree	Strongly disagree	Agree	Agree	Strongly agree	Strongly disagree	Strongly agree	Strongly disagree	Strongly disagree
r_107	to 26	Woman	Higher II	Over 6 years	I don't have any profile	"friends only" privacy settings	"friends only" privacy settings	I don't have any profile	I don't have any profile	Agree	Agree	Agree	Agree	I have no opinion	Agree	Agree	Agree	Agree	Disagree	Disagree	Disagree	Agree	Disagree
r_108	to 26	Man	Higher II	Over 6 years	I don't have any profile	"friends only" privacy settings	public profile	I don't have any profile	I don't have any profile	I have no opinion	I have no opinion	Agree	Disagree	Agree	Agree	Disagree	I have no opinion	Strongly disagree	Strongly agree	Strongly agree	Agree	Agree	Agree
r_109	to 26	Man	Higher II	From 4 to 6 years	I don't have any profile	I adjust my privacy settings	I don't have any profile	I adjust my privacy settings	I don't have any profile	I have no opinion	Disagree	Agree	I have no opinion	Agree	Agree	Agree	Agree	I have no opinion	Agree	I have no opinion	Agree	Agree	I have no opinion
r_110	27-40	Man	Higher II	Over 6 years	I don't have any profile	"friends only" privacy settings	"friends only" privacy settings	I don't have any profile	I don't have any profile	Strongly agree	Strongly agree	I have no opinion	Strongly disagree	Strongly agree	Strongly agree	I have no opinion	Agree	Agree	Strongly disagree	Disagree	Strongly disagree	Strongly agree	Strongly agree
r_111	27-40	Man	Higher II	Over 6 years	I don't have any profile	public profile	public profile	I don't know what my privacy settings are	I don't know what my privacy settings are	Agree	Agree	Strongly disagree	Strongly disagree	I have no opinion	Strongly disagree	#N/A	I have no opinion	Strongly disagree	Strongly disagree	Strongly disagree	Strongly disagree	Strongly disagree	Strongly disagree
r_112	27-40	Woman	Higher II	Over 6 years	I don't have any profile	I adjust my privacy settings	I adjust my privacy settings	I adjust my privacy settings	I don't have any profile	Disagree	Agree	Agree	I have no opinion	I have no opinion	Strongly agree	Agree	Agree	Agree	I have no opinion	Disagree	I have no opinion	Agree	I have no opinion
r_113	to 26	Woman	PhD	I don’t remember	I don't have any profile	I don't have any profile	I don't have any profile	I don't have any profile	I don't have any profile	I have no opinion	I have no opinion	Strongly disagree	Strongly disagree	Strongly disagree	Strongly disagree	Strongly disagree	Strongly disagree	I have no opinion	Strongly disagree	Strongly disagree	Strongly disagree	Strongly disagree	Strongly disagree
r_114	27-40	Woman	Higher I	I don’t remember	I don't have any profile	"friends only" privacy settings	I don't have any profile	"friends only" privacy settings	I adjust my privacy settings	Agree	Agree	Agree	I have no opinion	Agree	Strongly agree	I have no opinion	Strongly agree	Agree	Agree	Strongly disagree	Agree	Agree	Agree
r_115	to 26	Man	Higher I	Over 6 years	#N/A	"friends only" privacy settings	#N/A	#N/A	#N/A	Agree	Agree	Agree	Disagree	Agree	Strongly agree	Agree	Strongly agree	Strongly disagree	Agree	Strongly disagree	Agree	Agree	Agree
r_116	27-40	Woman	Higher II	Over 6 years	I don't have any profile	"friends only" privacy settings	I don't have any profile	I don't have any profile	I don't have any profile	Agree	Agree	Disagree	Disagree	Agree	Disagree	Disagree	Agree	Agree	Disagree	Disagree	Disagree	Disagree	Disagree
r_117	27-40	Woman	Higher II	Over 6 years	I don't have any profile	I adjust my privacy settings	I don't have any profile	I adjust my privacy settings	I don't have any profile	Strongly agree	Strongly agree	Agree	Strongly agree	Strongly agree	Strongly agree	Agree	Strongly agree	Strongly disagree	Strongly agree	Strongly agree	Agree	Strongly agree	Strongly disagree
r_118	27-40	Woman	Higher II	Over 6 years	I don't have any profile	I adjust my privacy settings	I adjust my privacy settings	I adjust my privacy settings	I don't have any profile	Agree	Agree	Disagree	Agree	Agree	Disagree	Agree	Strongly agree	Agree	Agree	Disagree	Disagree	Disagree	Disagree
r_119	27-40	Man	Higher II	From 4 to 6 years	I don't have any profile	"friends only" privacy settings	public profile	I don't have any profile	I don't have any profile	Disagree	Disagree	Agree	Agree	Agree	Agree	Agree	I have no opinion	I have no opinion	Agree	I have no opinion	I have no opinion	Agree	I have no opinion
r_120	27-40	Woman	Higher II	Over 6 years	I don't have any profile	I adjust my privacy settings	I adjust my privacy settings	I don't know what my privacy settings are	I don't have any profile	#N/A	#N/A	#N/A	#N/A	#N/A	#N/A	#N/A	#N/A	Agree	Strongly agree	Strongly disagree	I have no opinion	Strongly agree	Strongly disagree
r_121	27-40	Woman	Higher II	Over 6 years	"friends only" privacy settings	"friends only" privacy settings	"friends only" privacy settings	"friends only" privacy settings	"friends only" privacy settings	Agree	Agree	I have no opinion	Agree	Agree	I have no opinion	I have no opinion	Agree	Agree	Disagree	Disagree	Agree	I have no opinion	I have no opinion
r_122	to 26	Woman	Higher II	I don’t remember	I don't have any profile	I adjust my privacy settings	I don't know what my privacy settings are	I don't know what my privacy settings are	I don't have any profile	I have no opinion	Agree	Agree	Strongly disagree	I have no opinion	Strongly disagree	Strongly disagree	Strongly disagree	Strongly disagree	Strongly disagree	Strongly disagree	Strongly disagree	Agree	I have no opinion
r_123	27-40	Woman	Higher II	Over 6 years	"friends only" privacy settings	"friends only" privacy settings	"friends only" privacy settings	"friends only" privacy settings	"friends only" privacy settings	Strongly agree	#N/A	Agree	I have no opinion	Strongly agree	Strongly agree	I have no opinion	Agree	Strongly agree	Strongly agree	Strongly disagree	I have no opinion	Disagree	Agree
r_124	27-40	Woman	Higher II	Over 6 years	I don't have any profile	"friends only" privacy settings	"friends only" privacy settings	I don't have any profile	I don't have any profile	Agree	Agree	Agree	Agree	Agree	I have no opinion	Agree	Agree	I have no opinion	Agree	Disagree	Agree	Agree	Agree
r_125	to 26	Woman	Higher II	Over 6 years	I don't have any profile	public profile	I don't have any profile	public profile	I don't have any profile	I have no opinion	Agree	Disagree	I have no opinion	I have no opinion	I have no opinion	I have no opinion	I have no opinion	Agree	I have no opinion	I have no opinion	Agree	Agree	I have no opinion
r_126	27-40	Woman	Higher II	Over 6 years	I don't have any profile	"friends only" privacy settings	I don't have any profile	I don't have any profile	I don't have any profile	Disagree	Disagree	Disagree	Disagree	Disagree	Disagree	Disagree	Disagree	Strongly disagree	Strongly disagree	Strongly disagree	Strongly disagree	Strongly disagree	Strongly disagree
r_127	to 26	Man	Higher II	Up to 2 years	#N/A	#N/A	public profile	public profile	#N/A	Agree	I have no opinion	I have no opinion	I have no opinion	Agree	Disagree	Disagree	Agree	Disagree	Disagree	Disagree	Agree	Disagree	Disagree
r_128	27-40	Woman	Higher I	Over 6 years	I don't have any profile	I adjust my privacy settings	I adjust my privacy settings	I don't have any profile	I don't have any profile	Strongly agree	Strongly agree	Strongly agree	Agree	Agree	Strongly agree	Strongly agree	Strongly agree	Strongly agree	Strongly agree	Agree	Agree	Agree	Agree
r_129	27-40	Man	Secondary	Over 6 years	I don't have any profile	I adjust my privacy settings	I don't have any profile	I adjust my privacy settings	I adjust my privacy settings	I have no opinion	Agree	I have no opinion	I have no opinion	Strongly agree	Strongly agree	Strongly agree	Strongly agree	I have no opinion	Agree	I have no opinion	Agree	Agree	I have no opinion
r_130	to 26	Woman	Higher II	Over 6 years	I don't have any profile	"friends only" privacy settings	I don't have any profile	I don't have any profile	I don't have any profile	I have no opinion	Agree	Agree	Disagree	Agree	Agree	Disagree	Strongly agree	Strongly agree	Disagree	Disagree	Agree	Disagree	Strongly disagree
r_131	to 26	Woman	Higher II	Over 6 years	I don't have any profile	I adjust my privacy settings	I adjust my privacy settings	I don't have any profile	I don't have any profile	Agree	Agree	Disagree	Disagree	I have no opinion	Disagree	Disagree	I have no opinion	I have no opinion	Disagree	Disagree	Agree	Disagree	Disagree
r_132	to 26	Woman	Secondary	From 2 to 4 years	I don't have any profile	"friends only" privacy settings	public profile	I don't have any profile	public profile	Agree	Agree	Disagree	Agree	Agree	I have no opinion	I have no opinion	Agree	Strongly agree	Disagree	Disagree	Strongly disagree	I have no opinion	Strongly disagree
r_133	to 26	Man	Higher II	Over 6 years	I don't have any profile	I adjust my privacy settings	I adjust my privacy settings	public profile	I don't have any profile	Strongly disagree	Disagree	I have no opinion	Strongly disagree	I have no opinion	Strongly disagree	Strongly disagree	I have no opinion	Strongly disagree	Strongly disagree	Strongly disagree	Strongly disagree	Strongly disagree	Strongly disagree
r_134	to 26	Man	Higher II	Over 6 years	I adjust my privacy settings	I adjust my privacy settings	I adjust my privacy settings	I adjust my privacy settings	I adjust my privacy settings	Agree	Agree	Disagree	Disagree	I have no opinion	Disagree	Disagree	I have no opinion	I have no opinion	Disagree	Strongly disagree	I have no opinion	Strongly disagree	Strongly disagree
r_135	to 26	Woman	Higher II	From 4 to 6 years	I don't have any profile	public profile	public profile	public profile	public profile	Agree	Strongly agree	Agree	Agree	Strongly agree	Agree	I have no opinion	Strongly agree	Strongly agree	Strongly disagree	Strongly disagree	Agree	Disagree	Disagree
r_136	to 26	Man	Higher II	Over 6 years	public profile	public profile	I don't know what my privacy settings are	I don't have any profile	I don't have any profile	I have no opinion	I have no opinion	Agree	I have no opinion	Agree	I have no opinion	I have no opinion	Agree	Strongly disagree	Strongly disagree	Strongly disagree	Agree	Disagree	Strongly disagree
r_137	27-40	Woman	Higher II	I don’t remember	I don't have any profile	I adjust my privacy settings	I adjust my privacy settings	I don't have any profile	I don't have any profile	Agree	Agree	Strongly disagree	Strongly disagree	Agree	Disagree	Strongly disagree	Agree	Agree	I have no opinion	I have no opinion	Agree	Strongly disagree	Strongly disagree
r_138	to 26	Man	Higher II	Over 6 years	I don't have any profile	public profile	I don't know what my privacy settings are	I don't know what my privacy settings are	I don't have any profile	Strongly agree	Strongly agree	Strongly disagree	Agree	Strongly agree	Strongly disagree	I have no opinion	Strongly agree	Strongly agree	Strongly disagree	Strongly disagree	Agree	Strongly disagree	Strongly disagree
r_139	27-40	Man	Higher I	Over 6 years	I don't have any profile	I adjust my privacy settings	public profile	I adjust my privacy settings	I adjust my privacy settings	Strongly agree	Strongly agree	Strongly agree	I have no opinion	Strongly agree	Strongly agree	I have no opinion	Agree	Strongly agree	Strongly agree	Strongly disagree	Agree	Strongly agree	Strongly disagree
r_140	27-40	Man	Higher I	Over 6 years	I don't have any profile	"friends only" privacy settings	I adjust my privacy settings	public profile	public profile	Agree	Agree	#N/A	Agree	Agree	Agree	Agree	Agree	Disagree	Agree	Agree	Agree	Disagree	Strongly disagree
r_141	to 26	Man	Higher II	Over 6 years	I don't have any profile	"friends only" privacy settings	"friends only" privacy settings	I don't have any profile	I don't have any profile	Agree	Agree	Agree	Agree	Agree	I have no opinion	Agree	Agree	I have no opinion	I have no opinion	I have no opinion	I have no opinion	I have no opinion	I have no opinion
r_142	27-40	Man	Higher II	I don’t remember	I don't have any profile	I adjust my privacy settings	I adjust my privacy settings	I adjust my privacy settings	I adjust my privacy settings	Agree	Agree	I have no opinion	I have no opinion	Agree	I have no opinion	I have no opinion	I have no opinion	I have no opinion	Agree	Agree	Agree	I have no opinion	I have no opinion
r_143	to 26	Man	Higher II	Over 6 years	I don't have any profile	public profile	I don't have any profile	I don't have any profile	I don't have any profile	Disagree	Disagree	Disagree	Disagree	Disagree	Disagree	Disagree	Agree	Disagree	Disagree	Disagree	Disagree	Disagree	Disagree
r_144	to 26	Man	Higher II	Over 6 years	I don't have any profile	public profile	public profile	I don't have any profile	I don't have any profile	Strongly agree	Strongly agree	Strongly agree	Strongly agree	Strongly agree	Strongly agree	#N/A	Strongly agree	I have no opinion	Strongly agree	Strongly agree	Strongly agree	Strongly agree	Strongly agree
r_145	to 26	Man	Secondary	From 4 to 6 years	I don't have any profile	"friends only" privacy settings	"friends only" privacy settings	#N/A	public profile	Strongly agree	Strongly agree	Strongly agree	Strongly agree	Strongly agree	Strongly agree	Strongly agree	Strongly agree	Agree	Agree	Agree	Agree	Agree	Agree
r_146	27-40	Man	Higher II	Over 6 years	I don't have any profile	public profile	public profile	public profile	I don't know what my privacy settings are	Agree	Agree	I have no opinion	I have no opinion	Agree	Agree	Agree	Strongly agree	Disagree	Agree	Strongly agree	Agree	Disagree	Disagree
r_147	to 26	Man	Secondary	I don’t remember	I don't have any profile	public profile	public profile	public profile	I don't know what my privacy settings are	Agree	Agree	Agree	I have no opinion	Agree	I have no opinion	I have no opinion	Agree	I have no opinion	Agree	I have no opinion	I have no opinion	Agree	Disagree
r_148	27-40	Man	Higher I	Over 6 years	I don't have any profile	I adjust my privacy settings	I adjust my privacy settings	I don't know what my privacy settings are	I don't have any profile	Agree	Agree	Agree	Agree	Agree	Agree	Agree	Agree	Agree	Agree	Disagree	Agree	Agree	I have no opinion
r_149	27-40	Woman	Higher II	Over 6 years	I don't have any profile	I adjust my privacy settings	"friends only" privacy settings	I adjust my privacy settings	I don't have any profile	Agree	Strongly agree	Disagree	Agree	Strongly agree	Agree	Disagree	Strongly agree	Disagree	Strongly agree	Disagree	Strongly agree	Agree	Strongly disagree
r_150	to 26	Woman	Higher II	Over 6 years	I don't have any profile	public profile	I don't have any profile	I don't have any profile	I don't have any profile	Disagree	Disagree	Strongly disagree	Strongly disagree	I have no opinion	Strongly disagree	Strongly disagree	Disagree	Agree	Strongly disagree	Strongly disagree	I have no opinion	Strongly disagree	Strongly disagree
r_151	27-40	Man	Higher I	Over 6 years	"friends only" privacy settings	"friends only" privacy settings	"friends only" privacy settings	"friends only" privacy settings	"friends only" privacy settings	Strongly agree	#N/A	#N/A	Strongly agree	Strongly agree	Strongly agree	Strongly agree	Strongly agree	Strongly agree	Strongly agree	#N/A	Agree	Agree	Agree
r_152	27-40	Woman	Higher II	Over 6 years	I don't have any profile	"friends only" privacy settings	I don't have any profile	I don't know what my privacy settings are	I don't have any profile	Strongly disagree	Strongly disagree	#N/A	#N/A	Agree	Agree	Strongly disagree	Strongly disagree	Strongly disagree	Strongly disagree	Strongly disagree	Agree	Strongly disagree	Strongly disagree
r_153	27-40	Man	Higher II	I don’t remember	I don't have any profile	I adjust my privacy settings	I adjust my privacy settings	I adjust my privacy settings	I don't have any profile	I have no opinion	Agree	Agree	Disagree	I have no opinion	Agree	Strongly disagree	Agree	Agree	Agree	Disagree	Agree	I have no opinion	Disagree
r_154	27-40	Man	Higher II	Over 6 years	I don't have any profile	"friends only" privacy settings	I don't have any profile	I don't have any profile	I don't have any profile	Agree	Agree	Agree	Disagree	Agree	Agree	I have no opinion	I have no opinion	I have no opinion	Agree	Strongly disagree	Agree	Disagree	Disagree
r_155	to 26	Man	Higher II	Over 6 years	"friends only" privacy settings	public profile	"friends only" privacy settings	I don't have any profile	I don't have any profile	Disagree	Disagree	Disagree	Disagree	Disagree	Disagree	Disagree	Disagree	Disagree	Agree	Disagree	Disagree	Disagree	Disagree
r_156	to 26	Man	Higher II	Over 6 years	I don't have any profile	I adjust my privacy settings	I don't have any profile	I don't have any profile	I don't have any profile	Agree	Agree	I have no opinion	I have no opinion	Agree	Agree	Agree	Agree	Agree	Agree	Strongly disagree	I have no opinion	Agree	I have no opinion
r_157	to 26	Man	Higher I	Over 6 years	I don't have any profile	I adjust my privacy settings	I don't have any profile	I adjust my privacy settings	I don't have any profile	Agree	Agree	Agree	Strongly disagree	Agree	Disagree	Disagree	Agree	Strongly disagree	Strongly disagree	Strongly disagree	Strongly disagree	Agree	Strongly disagree
r_158	27-40	Woman	Higher II	Over 6 years	I don't have any profile	I adjust my privacy settings	I adjust my privacy settings	I don't have any profile	I don't have any profile	Agree	Agree	Strongly agree	Strongly agree	Strongly agree	Strongly agree	Strongly agree	I have no opinion	I have no opinion	Strongly agree	Disagree	Disagree	Strongly agree	Strongly disagree
r_159	to 26	Man	Higher II	Over 6 years	"friends only" privacy settings	"friends only" privacy settings	"friends only" privacy settings	"friends only" privacy settings	I don't have any profile	Agree	Agree	Strongly disagree	Strongly disagree	Agree	Strongly disagree	Strongly disagree	Strongly disagree	Strongly disagree	Strongly disagree	Strongly disagree	Strongly disagree	Strongly disagree	Strongly disagree
r_160	to 26	Man	Higher I	Over 6 years	I adjust my privacy settings	I adjust my privacy settings	I adjust my privacy settings	I adjust my privacy settings	I adjust my privacy settings	Agree	Agree	Disagree	I have no opinion	Agree	Agree	Disagree	Agree	Agree	Agree	Disagree	Agree	Disagree	Agree
r_161	to 26	Man	Higher II	Over 6 years	public profile	I adjust my privacy settings	I adjust my privacy settings	I don't have any profile	I don't have any profile	Strongly agree	Strongly agree	Strongly disagree	I have no opinion	Strongly agree	Disagree	I have no opinion	Disagree	Agree	Agree	Strongly disagree	Disagree	Strongly disagree	Strongly disagree
r_162	27-40	Man	Higher II	Over 6 years	I don't have any profile	"friends only" privacy settings	I adjust my privacy settings	I adjust my privacy settings	I don't have any profile	Strongly agree	Strongly agree	I have no opinion	#N/A	#N/A	Agree	I have no opinion	Agree	Agree	Strongly agree	Disagree	Agree	I have no opinion	Disagree
r_163	27-40	Man	Higher II	Over 6 years	"friends only" privacy settings	"friends only" privacy settings	"friends only" privacy settings	"friends only" privacy settings	I adjust my privacy settings	Strongly agree	Strongly agree	Strongly agree	Strongly agree	Strongly agree	Strongly agree	Strongly agree	Strongly agree	Strongly agree	Strongly agree	Strongly disagree	Strongly agree	Strongly agree	Strongly agree
r_164	to 26	Man	PhD	Over 6 years	public profile	I adjust my privacy settings	"friends only" privacy settings	I adjust my privacy settings	I adjust my privacy settings	Agree	Agree	I have no opinion	I have no opinion	Agree	Agree	Agree	Agree	Disagree	Agree	Disagree	Agree	Agree	I have no opinion
r_165	to 26	Man	Higher II	Over 6 years	I don't know what my privacy settings are	I don't know what my privacy settings are	I don't know what my privacy settings are	I don't know what my privacy settings are	I don't know what my privacy settings are	Agree	Agree	Agree	Agree	Agree	Agree	Agree	Agree	Agree	I have no opinion	Agree	I have no opinion	Agree	I have no opinion
r_166	to 26	Man	Higher II	Over 6 years	I don't have any profile	I adjust my privacy settings	I don't have any profile	I adjust my privacy settings	I adjust my privacy settings	Agree	Agree	Disagree	Agree	Agree	Disagree	Disagree	Agree	Agree	Disagree	Disagree	Agree	Disagree	Disagree
r_167	to 26	Man	Higher II	Over 6 years	I don't have any profile	public profile	public profile	I don't know what my privacy settings are	I don't have any profile	Agree	#N/A	I have no opinion	Disagree	Agree	I have no opinion	Disagree	I have no opinion	I have no opinion	I have no opinion	Agree	Agree	I have no opinion	Disagree
r_168	to 26	Woman	Higher II	Over 6 years	I don't know what my privacy settings are	"friends only" privacy settings	I adjust my privacy settings	I don't know what my privacy settings are	I don't have any profile	I have no opinion	I have no opinion	Disagree	I have no opinion	Agree	Disagree	Disagree	Agree	Strongly agree	Disagree	Disagree	Agree	Disagree	Disagree
r_169	to 26	Man	Higher II	Over 6 years	I adjust my privacy settings	"friends only" privacy settings	#N/A	#N/A	#N/A	Agree	Agree	I have no opinion	Agree	Agree	Agree	#N/A	#N/A	Agree	Strongly agree	#N/A	Agree	I have no opinion	Agree
r_170	to 26	Woman	Higher II	From 4 to 6 years	I don't have any profile	I adjust my privacy settings	I don't have any profile	I don't know what my privacy settings are	I don't have any profile	Agree	Agree	Strongly disagree	Strongly disagree	Agree	Strongly disagree	Strongly disagree	Agree	Strongly disagree	Strongly disagree	Strongly disagree	Strongly agree	Strongly disagree	Strongly disagree
r_171	27-40	Woman	Higher II	Over 6 years	I don't have any profile	"friends only" privacy settings	I don't have any profile	I don't have any profile	I don't have any profile	Strongly agree	Strongly agree	Disagree	Disagree	Strongly agree	Disagree	Disagree	Strongly agree	I have no opinion	Agree	Disagree	Strongly agree	Disagree	Disagree
r_172	27-40	Woman	Higher II	From 4 to 6 years	I don't have any profile	I adjust my privacy settings	I adjust my privacy settings	I adjust my privacy settings	I don't have any profile	Agree	Agree	I have no opinion	I have no opinion	Agree	I have no opinion	I have no opinion	Agree	Disagree	Strongly agree	Strongly disagree	Agree	Agree	Strongly disagree
r_173	27-40	Man	Higher II	Over 6 years	public profile	"friends only" privacy settings	public profile	public profile	public profile	I have no opinion	I have no opinion	I have no opinion	Disagree	I have no opinion	I have no opinion	Disagree	Agree	Disagree	Agree	I have no opinion	Agree	Disagree	Disagree
r_174	27-40	Woman	Higher II	From 2 to 4 years	I don't have any profile	I adjust my privacy settings	I don't know what my privacy settings are	I don't have any profile	I don't have any profile	Agree	Agree	Agree	Agree	Agree	Agree	I have no opinion	Agree	Agree	Disagree	Disagree	Disagree	Agree	Disagree
r_175	27-40	Woman	Higher II	Over 6 years	I don't have any profile	public profile	I don't have any profile	I don't know what my privacy settings are	I don't have any profile	Disagree	Agree	Disagree	Disagree	Agree	Disagree	Disagree	Agree	Strongly disagree	Strongly disagree	Strongly disagree	Strongly disagree	Strongly disagree	Strongly disagree
r_176	to 26	Woman	Higher II	From 2 to 4 years	I don't have any profile	"friends only" privacy settings	I don't have any profile	I don't have any profile	I don't have any profile	Agree	Strongly agree	Disagree	Disagree	Agree	Disagree	Disagree	Agree	Agree	Disagree	Disagree	Agree	Disagree	Disagree
r_177	27-40	Woman	Higher II	From 4 to 6 years	I don't have any profile	I adjust my privacy settings	I don't have any profile	I don't know what my privacy settings are	I don't have any profile	Agree	Agree	Strongly disagree	Strongly disagree	Agree	Strongly disagree	Strongly disagree	Strongly disagree	Strongly disagree	Agree	Strongly disagree	Strongly disagree	Strongly disagree	Strongly disagree
r_178	to 26	Woman	Higher II	From 2 to 4 years	I don't have any profile	I adjust my privacy settings	I adjust my privacy settings	I don't have any profile	I don't have any profile	Strongly agree	Strongly agree	Disagree	Disagree	Strongly agree	Disagree	Disagree	Agree	Strongly agree	Disagree	Disagree	Agree	Disagree	Disagree
r_179	27-40	Woman	Higher II	Over 6 years	I don't have any profile	"friends only" privacy settings	I don't know what my privacy settings are	I don't have any profile	I don't have any profile	Agree	I have no opinion	Disagree	Disagree	I have no opinion	Agree	I have no opinion	Agree	I have no opinion	Strongly agree	Agree	Disagree	Disagree	Agree
r_180	27-40	Woman	Higher II	Over 6 years	I don't have any profile	I adjust my privacy settings	I don't have any profile	public profile	I don't have any profile	Agree	#N/A	Disagree	I have no opinion	Agree	Disagree	Disagree	I have no opinion	Agree	Agree	Disagree	I have no opinion	I have no opinion	Disagree
r_181	27-40	Man	Higher II	Over 6 years	I don't have any profile	I don't have any profile	I adjust my privacy settings	I don't have any profile	I don't have any profile	Agree	Agree	Disagree	Disagree	Disagree	Disagree	Disagree	Disagree	Disagree	Strongly disagree	Strongly disagree	Strongly disagree	Strongly disagree	Strongly disagree
r_182	above 57	Man	Secondary	Up to 2 years	I don't have any profile	I don't have any profile	I don't have any profile	I don't have any profile	I don't have any profile	I have no opinion	I have no opinion	Strongly disagree	Strongly disagree	Strongly agree	Strongly agree	Strongly disagree	Strongly agree	Strongly disagree	Strongly disagree	Strongly disagree	Strongly disagree	Strongly disagree	Strongly disagree
r_183	27-40	Woman	Higher II	Over 6 years	I don't have any profile	I adjust my privacy settings	I don't know what my privacy settings are	I don't have any profile	I don't have any profile	Agree	Agree	Agree	I have no opinion	Agree	Strongly agree	Agree	I have no opinion	I have no opinion	Strongly agree	I have no opinion	Strongly agree	Agree	Agree
r_184	27-40	Woman	Higher II	Over 6 years	I don't have any profile	"friends only" privacy settings	"friends only" privacy settings	"friends only" privacy settings	I don't have any profile	Strongly agree	Strongly agree	I have no opinion	I have no opinion	Strongly agree	Strongly agree	Disagree	Strongly agree	Disagree	Strongly agree	Strongly agree	Agree	Strongly agree	I have no opinion
r_185	to 26	Man	Higher II	Over 6 years	"friends only" privacy settings	I adjust my privacy settings	I don't know what my privacy settings are	"friends only" privacy settings	"friends only" privacy settings	Agree	Agree	I have no opinion	Disagree	Agree	I have no opinion	Agree	Strongly agree	Strongly agree	I have no opinion	I have no opinion	Agree	I have no opinion	I have no opinion
r_186	27-40	Man	Secondary	Over 6 years	I adjust my privacy settings	"friends only" privacy settings	"friends only" privacy settings	"friends only" privacy settings	"friends only" privacy settings	Disagree	Agree	Agree	I have no opinion	Agree	Agree	I have no opinion	Agree	I have no opinion	Agree	Disagree	Disagree	Agree	I have no opinion
r_187	27-40	Woman	Higher II	From 4 to 6 years	I don't have any profile	"friends only" privacy settings	I don't have any profile	I don't have any profile	I don't have any profile	Strongly disagree	Strongly disagree	Strongly disagree	Strongly disagree	Strongly disagree	Strongly disagree	Strongly disagree	Agree	Strongly disagree	Strongly disagree	Strongly disagree	Strongly disagree	Strongly disagree	Strongly disagree
r_188	to 26	Woman	Higher II	I don’t remember	I don't know what my privacy settings are	I don't know what my privacy settings are	I don't know what my privacy settings are	I don't know what my privacy settings are	I don't know what my privacy settings are	I have no opinion	I have no opinion	I have no opinion	I have no opinion	I have no opinion	I have no opinion	I have no opinion	I have no opinion	Agree	Disagree	Disagree	Disagree	Disagree	Disagree
r_189	to 26	Man	Higher II	From 4 to 6 years	#N/A	"friends only" privacy settings	#N/A	#N/A	#N/A	Agree	Agree	Disagree	Disagree	Agree	I have no opinion	I have no opinion	Agree	I have no opinion	Agree	Disagree	Disagree	Disagree	Disagree
r_190	27-40	Woman	Higher II	From 4 to 6 years	"friends only" privacy settings	"friends only" privacy settings	"friends only" privacy settings	I don't have any profile	I don't have any profile	Strongly agree	Strongly agree	Agree	Strongly agree	Strongly agree	Agree	Agree	Agree	Strongly agree	Agree	Agree	Disagree	Disagree	Disagree
r_191	27-40	Man	Higher II	Over 6 years	I don't have any profile	I don't have any profile	I don't have any profile	I don't have any profile	I don't have any profile	I have no opinion	I have no opinion	Disagree	Disagree	Agree	Disagree	Disagree	Agree	Disagree	Strongly disagree	Strongly disagree	I have no opinion	Strongly disagree	Strongly disagree
r_192	to 26	Woman	Higher I	Up to 2 years	"friends only" privacy settings	"friends only" privacy settings	"friends only" privacy settings	"friends only" privacy settings	"friends only" privacy settings	I have no opinion	Agree	Disagree	Disagree	Agree	Strongly disagree	Strongly disagree	Agree	Agree	Agree	Disagree	Disagree	Disagree	Disagree
r_193	27-40	Woman	Higher II	Over 6 years	I adjust my privacy settings	I adjust my privacy settings	I don't have any profile	I don't have any profile	I don't have any profile	I have no opinion	Agree	Disagree	Disagree	Agree	Disagree	Disagree	I have no opinion	Strongly disagree	Strongly disagree	Strongly disagree	Agree	Agree	Strongly disagree
r_194	27-40	Woman	Higher II	Over 6 years	I adjust my privacy settings	"friends only" privacy settings	"friends only" privacy settings	I don't have any profile	I don't have any profile	Agree	Agree	Agree	Agree	Agree	Agree	Agree	Agree	Strongly agree	Strongly agree	Strongly disagree	I have no opinion	Strongly agree	I have no opinion
r_195	27-40	Woman	Higher II	Over 6 years	I don't have any profile	"friends only" privacy settings	I don't know what my privacy settings are	I don't have any profile	I don't have any profile	Agree	Agree	Agree	Agree	Agree	Agree	I have no opinion	Agree	I have no opinion	Agree	Disagree	Agree	Agree	#N/A
r_196	to 26	Woman	Higher II	Over 6 years	I don't have any profile	"friends only" privacy settings	I adjust my privacy settings	I don't have any profile	I don't have any profile	Disagree	Disagree	Strongly disagree	Strongly disagree	I have no opinion	Strongly disagree	Strongly disagree	Agree	Agree	Strongly disagree	Strongly disagree	Strongly disagree	Strongly disagree	Strongly disagree
r_197	27-40	Woman	Higher II	Over 6 years	I don't have any profile	I adjust my privacy settings	public profile	I don't know what my privacy settings are	I don't have any profile	Agree	Agree	Strongly disagree	Strongly disagree	Agree	Strongly disagree	Strongly disagree	Agree	Agree	Strongly disagree	Strongly disagree	Strongly disagree	Strongly disagree	Strongly disagree
r_198	27-40	Woman	Higher I	Over 6 years	I don't have any profile	I adjust my privacy settings	I adjust my privacy settings	I don't have any profile	I don't have any profile	Disagree	Agree	Disagree	Disagree	Agree	Agree	Disagree	Agree	#N/A	Agree	Disagree	I have no opinion	Agree	I have no opinion
r_199	27-40	Woman	Higher II	Over 6 years	I don't have any profile	"friends only" privacy settings	I adjust my privacy settings	I don't have any profile	I don't have any profile	Agree	Agree	Disagree	I have no opinion	Disagree	Agree	Disagree	I have no opinion	Disagree	Agree	Disagree	Disagree	Disagree	Disagree
r_200	to 26	Woman	Higher I	Over 6 years	public profile	I adjust my privacy settings	I adjust my privacy settings	"friends only" privacy settings	I adjust my privacy settings	Strongly agree	Agree	I have no opinion	Agree	Strongly agree	I have no opinion	I have no opinion	Agree	I have no opinion	Agree	Agree	Agree	Agree	Agree
r_201	27-40	Woman	Higher II	Over 6 years	I don't have any profile	"friends only" privacy settings	I don't know what my privacy settings are	I don't have any profile	I don't have any profile	I have no opinion	Agree	Agree	I have no opinion	Agree	Agree	Disagree	Agree	Agree	Agree	Disagree	Agree	Disagree	Disagree
r_202	27-40	Woman	Higher II	I don’t remember	"friends only" privacy settings	"friends only" privacy settings	"friends only" privacy settings	public profile	public profile	I have no opinion	Agree	Agree	Agree	Agree	Disagree	Disagree	Strongly agree	I have no opinion	Strongly agree	Agree	Strongly agree	Agree	Agree
r_203	to 26	Man	Higher II	Over 6 years	I don't have any profile	I adjust my privacy settings	public profile	I adjust my privacy settings	public profile	Agree	Agree	Agree	I have no opinion	Agree	Agree	I have no opinion	Agree	Disagree	Disagree	Disagree	Agree	Disagree	Disagree
r_204	to 26	Man	Higher II	Over 6 years	I don't have any profile	I adjust my privacy settings	public profile	I adjust my privacy settings	public profile	Agree	Agree	Agree	I have no opinion	Agree	Agree	I have no opinion	Agree	Disagree	Disagree	Disagree	Agree	Disagree	Disagree
r_205	27-40	Woman	Higher II	I don’t remember	#N/A	"friends only" privacy settings	#N/A	#N/A	#N/A	I have no opinion	I have no opinion	I have no opinion	I have no opinion	Agree	I have no opinion	I have no opinion	I have no opinion	I have no opinion	I have no opinion	I have no opinion	Disagree	I have no opinion	Disagree
r_206	to 26	Man	Higher I	Over 6 years	"friends only" privacy settings	"friends only" privacy settings	"friends only" privacy settings	"friends only" privacy settings	"friends only" privacy settings	Agree	Agree	I have no opinion	I have no opinion	Agree	I have no opinion	I have no opinion	Agree	I have no opinion	Disagree	Strongly disagree	Strongly disagree	Disagree	Strongly disagree
r_207	to 26	Man	Higher II	From 4 to 6 years	#N/A	"friends only" privacy settings	I don't have any profile	I don't have any profile	I don't have any profile	I have no opinion	Agree	I have no opinion	I have no opinion	Agree	Disagree	I have no opinion	I have no opinion	Agree	Agree	Disagree	Disagree	Disagree	Disagree
r_208	above 57	Woman	Higher II	I don’t remember	"friends only" privacy settings	I adjust my privacy settings	I adjust my privacy settings	I don't have any profile	I adjust my privacy settings	Agree	Agree	Strongly agree	Agree	Strongly agree	Strongly agree	Agree	Strongly agree	Agree	Strongly agree	Agree	I have no opinion	Strongly agree	Agree
r_209	27-40	Woman	Higher II	Over 6 years	I don't have any profile	I adjust my privacy settings	I don't have any profile	I don't have any profile	I don't have any profile	Strongly agree	Strongly agree	I have no opinion	I have no opinion	I have no opinion	Agree	I have no opinion	I have no opinion	Strongly agree	Strongly agree	Disagree	Disagree	Disagree	Disagree
r_210	to 26	Man	Higher I	From 4 to 6 years	"friends only" privacy settings	"friends only" privacy settings	"friends only" privacy settings	I don't have any profile	I don't have any profile	I have no opinion	Agree	Agree	Strongly disagree	Agree	I have no opinion	Strongly disagree	Strongly agree	#N/A	Strongly disagree	Strongly disagree	Strongly disagree	Strongly disagree	Strongly disagree
r_211	27-40	Man	Higher II	Over 6 years	I don't have any profile	"friends only" privacy settings	I don't have any profile	I don't have any profile	I don't have any profile	Strongly disagree	Agree	Strongly disagree	Strongly disagree	Strongly disagree	Strongly disagree	Strongly disagree	Agree	Agree	Agree	Strongly disagree	Strongly disagree	Agree	Strongly disagree
r_212	27-40	Woman	Higher II	I don’t remember	I don't have any profile	I adjust my privacy settings	I adjust my privacy settings	I don't know what my privacy settings are	I don't have any profile	Strongly agree	Strongly agree	Strongly agree	Agree	I have no opinion	Agree	I have no opinion	Agree	I have no opinion	Strongly agree	Strongly agree	Disagree	I have no opinion	I have no opinion
r_213	to 26	Man	Higher I	From 4 to 6 years	I don't have any profile	public profile	public profile	public profile	I don't have any profile	Agree	Agree	Agree	Agree	Agree	Agree	Agree	Agree	Disagree	Agree	Agree	Disagree	Agree	Disagree
r_214	to 26	Man	Higher II	Over 6 years	public profile	"friends only" privacy settings	I don't have any profile	"friends only" privacy settings	I don't have any profile	I have no opinion	Agree	Agree	I have no opinion	Agree	Agree	I have no opinion	Agree	Agree	Agree	Disagree	Agree	Agree	I have no opinion
r_215	27-40	Woman	Higher I	From 2 to 4 years	I don't have any profile	I don't know what my privacy settings are	I don't know what my privacy settings are	I don't have any profile	I don't have any profile	Strongly agree	Strongly agree	Strongly disagree	Strongly disagree	Agree	Disagree	Disagree	Strongly agree	Strongly agree	Disagree	Strongly disagree	Disagree	Disagree	Strongly disagree
r_216	to 26	Man	Higher I	Over 6 years	I don't have any profile	"friends only" privacy settings	"friends only" privacy settings	"friends only" privacy settings	"friends only" privacy settings	Agree	Agree	Agree	I have no opinion	Agree	Agree	Disagree	Agree	Disagree	Agree	Disagree	Agree	Disagree	Disagree
r_217	27-40	Woman	Higher II	I don’t remember	I don't have any profile	"friends only" privacy settings	I adjust my privacy settings	I don't have any profile	I don't have any profile	Agree	Agree	I have no opinion	I have no opinion	Agree	Agree	I have no opinion	Agree	Agree	Agree	I have no opinion	I have no opinion	I have no opinion	I have no opinion
r_218	27-40	Man	Higher I	Over 6 years	I adjust my privacy settings	I adjust my privacy settings	I adjust my privacy settings	I don't have any profile	I adjust my privacy settings	Agree	Agree	Agree	Agree	Agree	Agree	I have no opinion	Agree	Agree	Agree	Agree	Agree	Agree	I have no opinion
r_219	27-40	Man	Higher II	From 4 to 6 years	I don't have any profile	I don't know what my privacy settings are	I don't know what my privacy settings are	I don't know what my privacy settings are	I don't know what my privacy settings are	Disagree	Agree	Strongly disagree	I have no opinion	Agree	Agree	Agree	Strongly agree	I have no opinion	I have no opinion	Agree	Agree	Agree	Strongly disagree
r_220	27-40	Man	Higher I	Over 6 years	I don't have any profile	"friends only" privacy settings	"friends only" privacy settings	I don't know what my privacy settings are	I don't have any profile	Agree	Agree	Agree	I have no opinion	Agree	Agree	Agree	Agree	Disagree	Disagree	Disagree	Agree	Agree	Disagree
r_221	27-40	Woman	Higher I	Over 6 years	public profile	I adjust my privacy settings	public profile	I adjust my privacy settings	I don't have any profile	Agree	Strongly agree	Strongly agree	Strongly disagree	Strongly agree	Agree	Strongly disagree	Strongly agree	Agree	Agree	Strongly disagree	Strongly disagree	Strongly disagree	Strongly disagree
r_222	27-40	Man	Higher I	Over 6 years	I don't have any profile	public profile	public profile	I adjust my privacy settings	I don't have any profile	Agree	Agree	Strongly disagree	Strongly disagree	Agree	Agree	Strongly disagree	Strongly agree	Disagree	I have no opinion	Strongly disagree	I have no opinion	I have no opinion	Strongly disagree
r_223	27-40	Woman	Higher II	Over 6 years	I adjust my privacy settings	"friends only" privacy settings	"friends only" privacy settings	I don't have any profile	I don't have any profile	Disagree	Agree	Disagree	Disagree	Agree	Disagree	Disagree	I have no opinion	Strongly disagree	Disagree	Strongly disagree	Strongly disagree	Strongly disagree	Strongly disagree
r_224	27-40	Man	Secondary	Over 6 years	I don't have any profile	"friends only" privacy settings	I adjust my privacy settings	I don't have any profile	I don't have any profile	Disagree	Disagree	Disagree	Disagree	Disagree	Disagree	Disagree	Agree	Disagree	Disagree	Disagree	Disagree	Disagree	Disagree
r_225	27-40	Woman	Higher II	Over 6 years	I don't have any profile	I adjust my privacy settings	I adjust my privacy settings	I adjust my privacy settings	I adjust my privacy settings	Agree	Agree	Agree	I have no opinion	Agree	I have no opinion	I have no opinion	I have no opinion	Agree	Disagree	Disagree	Agree	Agree	Disagree
r_226	27-40	Woman	Higher I	Over 6 years	I don't have any profile	"friends only" privacy settings	"friends only" privacy settings	"friends only" privacy settings	I don't have any profile	Agree	Strongly agree	Disagree	Strongly disagree	Strongly agree	Disagree	Disagree	Strongly agree	Agree	Agree	Strongly disagree	Agree	Disagree	Strongly disagree
r_227	27-40	Man	Higher I	Over 6 years	I don't have any profile	"friends only" privacy settings	public profile	I don't have any profile	I don't have any profile	Disagree	Disagree	Disagree	Disagree	Agree	Agree	Disagree	Disagree	Disagree	Agree	Disagree	Disagree	Disagree	Disagree
r_228	above 57	Woman	Secondary	Up to 2 years	I don't have any profile	I don't know what my privacy settings are	I don't have any profile	I don't have any profile	I don't have any profile	Agree	Agree	Strongly disagree	Disagree	Agree	Disagree	Strongly disagree	Agree	Disagree	Strongly disagree	Strongly disagree	Strongly disagree	Strongly disagree	Strongly disagree
r_229	above 57	Man	Higher I	Up to 2 years	I don't have any profile	I don't know what my privacy settings are	I don't know what my privacy settings are	I don't know what my privacy settings are	I don't know what my privacy settings are	Agree	Strongly agree	Agree	Disagree	Agree	Strongly disagree	Strongly disagree	Agree	Agree	Strongly disagree	Strongly disagree	Strongly disagree	Strongly disagree	Strongly disagree
r_230	above 57	Man	Secondary	Up to 2 years	I don't have any profile	I don't know what my privacy settings are	I don't have any profile	I don't have any profile	I don't have any profile	I have no opinion	Disagree	Disagree	Disagree	Agree	I have no opinion	Disagree	Agree	Strongly disagree	Strongly disagree	Strongly disagree	I have no opinion	Disagree	Disagree
r_231	27-40	Woman	Higher II	Over 6 years	I don't know what my privacy settings are	I adjust my privacy settings	I don't know what my privacy settings are	I don't have any profile	I don't have any profile	I have no opinion	I have no opinion	I have no opinion	I have no opinion	I have no opinion	I have no opinion	I have no opinion	I have no opinion	I have no opinion	Agree	Strongly agree	I have no opinion	I have no opinion	I have no opinion
r_232	27-40	Woman	Higher II	Over 6 years	I don't know what my privacy settings are	I adjust my privacy settings	I don't know what my privacy settings are	I don't have any profile	I don't have any profile	I have no opinion	I have no opinion	I have no opinion	I have no opinion	I have no opinion	I have no opinion	I have no opinion	I have no opinion	I have no opinion	Agree	Strongly agree	I have no opinion	I have no opinion	I have no opinion
r_233	above 57	Man	Higher I	I don’t remember	I don't know what my privacy settings are	I adjust my privacy settings	I don't know what my privacy settings are	I don't have any profile	I don't have any profile	Disagree	Disagree	Disagree	Disagree	Agree	Disagree	Disagree	Agree	Agree	Disagree	Disagree	Disagree	Disagree	Disagree
r_234	to 26	Woman	Higher II	Over 6 years	I don't have any profile	public profile	I don't have any profile	I don't have any profile	I don't have any profile	Strongly agree	Strongly agree	Strongly agree	Agree	Strongly agree	Strongly agree	Strongly agree	Strongly agree	Agree	Strongly agree	Agree	Agree	Strongly agree	Disagree
r_235	to 26	Woman	Higher II	Over 6 years	I don't have any profile	I adjust my privacy settings	I adjust my privacy settings	I adjust my privacy settings	I adjust my privacy settings	Agree	Strongly agree	Agree	Strongly agree	Strongly agree	Agree	Agree	Agree	Strongly disagree	Strongly agree	Strongly agree	Agree	Strongly agree	Strongly disagree
r_236	to 26	Woman	Postgraduate	Over 6 years	I don't have any profile	I adjust my privacy settings	I don't have any profile	public profile	I don't have any profile	Agree	Agree	Disagree	Strongly disagree	I have no opinion	I have no opinion	I have no opinion	I have no opinion	I have no opinion	Agree	Disagree	Agree	Disagree	Strongly disagree
r_237	to 26	Woman	Higher II	Over 6 years	I don't have any profile	"friends only" privacy settings	I don't have any profile	"friends only" privacy settings	"friends only" privacy settings	Strongly agree	Strongly agree	Disagree	Strongly disagree	Agree	Disagree	Strongly disagree	Agree	Strongly disagree	I have no opinion	I have no opinion	Disagree	Strongly agree	Strongly disagree
r_238	to 26	Woman	Secondary	I don’t remember	I don't have any profile	"friends only" privacy settings	"friends only" privacy settings	I adjust my privacy settings	I don't have any profile	Strongly agree	Strongly agree	Strongly agree	I have no opinion	Strongly agree	Strongly agree	Strongly agree	Strongly agree	Disagree	Strongly agree	I have no opinion	I have no opinion	Strongly agree	I have no opinion
r_239	27-40	Woman	Higher II	I don’t remember	I don't have any profile	I adjust my privacy settings	"friends only" privacy settings	I don't have any profile	I don't have any profile	Strongly agree	Strongly agree	Strongly agree	Strongly agree	Strongly agree	Strongly agree	Strongly agree	Strongly agree	I have no opinion	I have no opinion	I have no opinion	I have no opinion	Strongly agree	Strongly agree
r_240	to 26	Woman	PhD	Over 6 years	"friends only" privacy settings	I adjust my privacy settings	"friends only" privacy settings	"friends only" privacy settings	I don't have any profile	Strongly disagree	I have no opinion	Strongly disagree	Strongly disagree	Strongly disagree	Strongly disagree	Strongly disagree	I have no opinion	Strongly disagree	Strongly disagree	Strongly disagree	Agree	Strongly disagree	Strongly disagree
r_241	27-40	Woman	Postgraduate	Over 6 years	#N/A	"friends only" privacy settings	#N/A	#N/A	#N/A	Strongly agree	Strongly agree	Agree	I have no opinion	Agree	Strongly agree	I have no opinion	Agree	Strongly agree	Strongly agree	Strongly agree	#N/A	Agree	I have no opinion
r_242	to 26	Woman	Higher I	Over 6 years	I don't have any profile	"friends only" privacy settings	I don't have any profile	I don't have any profile	I don't have any profile	I have no opinion	I have no opinion	I have no opinion	I have no opinion	Agree	Agree	I have no opinion	I have no opinion	Agree	Agree	Disagree	I have no opinion	I have no opinion	I have no opinion
r_243	27-40	Woman	Higher II	Over 6 years	I don't have any profile	public profile	public profile	public profile	I don't have any profile	Agree	Strongly agree	Agree	I have no opinion	Strongly agree	Agree	I have no opinion	I have no opinion	Agree	Agree	Disagree	Agree	I have no opinion	I have no opinion
r_244	to 26	Man	Higher II	Over 6 years	I don't have any profile	public profile	I adjust my privacy settings	I adjust my privacy settings	I adjust my privacy settings	I have no opinion	Agree	Agree	Disagree	I have no opinion	Agree	I have no opinion	I have no opinion	Agree	Agree	Disagree	I have no opinion	Agree	Disagree
r_245	to 26	Woman	Higher II	Over 6 years	I don't have any profile	"friends only" privacy settings	I adjust my privacy settings	I adjust my privacy settings	public profile	Agree	Agree	Agree	Agree	#N/A	Agree	Agree	Agree	Agree	Agree	Agree	Agree	Agree	Agree
r_246	to 26	Man	Higher II	Over 6 years	"friends only" privacy settings	I adjust my privacy settings	"friends only" privacy settings	"friends only" privacy settings	"friends only" privacy settings	Strongly agree	Strongly agree	Strongly agree	I have no opinion	Agree	Agree	I have no opinion	I have no opinion	Strongly agree	Strongly agree	Strongly agree	I have no opinion	I have no opinion	I have no opinion
r_247	to 26	Woman	Higher II	I don’t remember	I don't have any profile	"friends only" privacy settings	public profile	public profile	public profile	Agree	Agree	Agree	Strongly disagree	Agree	Strongly disagree	Strongly disagree	Agree	Strongly disagree	Agree	Strongly disagree	Agree	Agree	Strongly disagree
r_248	to 26	Woman	Higher II	Up to 2 years	I don't have any profile	"friends only" privacy settings	I don't have any profile	I don't have any profile	I don't have any profile	Agree	Agree	Agree	Agree	Agree	Agree	I have no opinion	Agree	Strongly agree	Disagree	Disagree	I have no opinion	Agree	Disagree
r_249	27-40	Woman	Higher II	Over 6 years	"friends only" privacy settings	"friends only" privacy settings	public profile	"friends only" privacy settings	"friends only" privacy settings	Agree	Agree	Disagree	Agree	Agree	Agree	Agree	Agree	Agree	Agree	Disagree	Disagree	Disagree	Disagree
r_250	27-40	Woman	Higher II	Over 6 years	I don't have any profile	public profile	I don't have any profile	I don't know what my privacy settings are	I don't know what my privacy settings are	Strongly agree	Strongly agree	Strongly disagree	Strongly disagree	Agree	Disagree	Disagree	Agree	Agree	Agree	Disagree	Strongly disagree	Disagree	Disagree
r_251	to 26	Woman	Higher II	Over 6 years	I don't have any profile	I adjust my privacy settings	I don't have any profile	I adjust my privacy settings	I don't have any profile	Agree	Agree	Agree	Disagree	Strongly agree	I have no opinion	I have no opinion	Agree	Agree	I have no opinion	I have no opinion	I have no opinion	Agree	I have no opinion
r_252	27-40	Woman	Higher II	From 2 to 4 years	"friends only" privacy settings	"friends only" privacy settings	I don't know what my privacy settings are	I adjust my privacy settings	I adjust my privacy settings	Strongly agree	Strongly agree	I have no opinion	Agree	Strongly agree	Agree	Agree	Strongly agree	Agree	Disagree	Strongly disagree	I have no opinion	Agree	Strongly disagree
r_253	27-40	Woman	Higher II	Over 6 years	I don't have any profile	"friends only" privacy settings	I don't have any profile	I don't have any profile	I don't have any profile	Strongly agree	Strongly agree	I have no opinion	Agree	Strongly agree	I have no opinion	I have no opinion	Disagree	Agree	Disagree	Disagree	Disagree	Disagree	Disagree
r_254	27-40	Woman	Higher II	Over 6 years	I don't have any profile	"friends only" privacy settings	"friends only" privacy settings	I don't have any profile	I don't have any profile	I have no opinion	Agree	I have no opinion	Strongly disagree	I have no opinion	Disagree	Disagree	I have no opinion	Strongly disagree	Disagree	Strongly disagree	Agree	Strongly disagree	Strongly disagree
r_255	to 26	Woman	Higher II	Over 6 years	I don't have any profile	"friends only" privacy settings	I don't have any profile	"friends only" privacy settings	I don't have any profile	Strongly agree	Strongly agree	Agree	I have no opinion	Strongly agree	Strongly agree	I have no opinion	Agree	I have no opinion	Strongly agree	I have no opinion	Agree	Strongly agree	I have no opinion
r_256	to 26	Woman	Higher II	Over 6 years	I don't have any profile	"friends only" privacy settings	public profile	public profile	public profile	Strongly agree	Strongly agree	Strongly agree	Strongly agree	Agree	Agree	Agree	Agree	Strongly disagree	Agree	Disagree	Strongly agree	Strongly agree	Strongly disagree
r_257	above 57	Woman	Secondary	From 2 to 4 years	I don't have any profile	I adjust my privacy settings	I don't have any profile	I don't have any profile	I don't have any profile	I have no opinion	I have no opinion	I have no opinion	Disagree	Agree	Disagree	Disagree	Agree	Strongly disagree	Strongly disagree	Strongly disagree	Strongly disagree	Agree	Strongly disagree
r_258	to 26	Man	Higher I	I don’t remember	I adjust my privacy settings	I adjust my privacy settings	I adjust my privacy settings	public profile	I don't have any profile	Agree	Agree	Disagree	Disagree	Agree	Agree	Disagree	Agree	Strongly disagree	Agree	Disagree	Agree	Disagree	Strongly agree
r_259	to 26	Woman	PhD	Over 6 years	I don't have any profile	"friends only" privacy settings	"friends only" privacy settings	I don't have any profile	I don't have any profile	Strongly disagree	Strongly disagree	Strongly disagree	Strongly disagree	Strongly disagree	Strongly disagree	Strongly disagree	Strongly disagree	Strongly agree	Strongly disagree	Strongly disagree	Strongly disagree	Strongly disagree	Strongly disagree
r_260	to 26	Woman	Higher II	From 2 to 4 years	I don't have any profile	I don't know what my privacy settings are	I don't have any profile	I don't have any profile	I don't have any profile	Strongly agree	Strongly agree	Strongly agree	Strongly agree	Strongly agree	Strongly agree	I have no opinion	Strongly agree	Strongly agree	Strongly agree	Strongly agree	Strongly disagree	Strongly agree	Strongly disagree
r_261	to 26	Man	Higher II	Over 6 years	I don't have any profile	"friends only" privacy settings	I adjust my privacy settings	I don't have any profile	I don't have any profile	I have no opinion	Agree	Agree	I have no opinion	Disagree	Strongly agree	Disagree	Disagree	Strongly disagree	Strongly agree	Strongly disagree	Strongly disagree	Agree	Strongly disagree
r_262	to 26	Woman	Higher II	From 4 to 6 years	I don't have any profile	public profile	I don't know what my privacy settings are	"friends only" privacy settings	I don't have any profile	Agree	Strongly agree	Agree	Agree	Strongly agree	Agree	Agree	Agree	Disagree	Agree	Agree	Agree	I have no opinion	Disagree
r_263	27-40	Woman	Higher II	Over 6 years	I don't have any profile	"friends only" privacy settings	I adjust my privacy settings	I don't have any profile	I don't have any profile	Agree	Agree	Disagree	#N/A	Disagree	Disagree	Strongly disagree	Strongly disagree	Disagree	Disagree	Disagree	Disagree	Disagree	Disagree
r_264	to 26	Woman	Higher II	From 4 to 6 years	I don't have any profile	public profile	I adjust my privacy settings	I don't know what my privacy settings are	I don't know what my privacy settings are	Disagree	Agree	Strongly disagree	Strongly disagree	Agree	Strongly disagree	Strongly disagree	Disagree	Strongly agree	Strongly agree	Disagree	Disagree	Strongly agree	Strongly disagree
r_265	to 26	Man	Higher II	Over 6 years	I don't have any profile	public profile	I don't have any profile	public profile	I don't have any profile	Agree	Agree	Disagree	Disagree	Agree	Strongly disagree	Disagree	I have no opinion	Agree	Disagree	Disagree	Agree	Disagree	Disagree
r_266	27-40	Man	Secondary	Over 6 years	I don't have any profile	"friends only" privacy settings	I adjust my privacy settings	I adjust my privacy settings	I don't have any profile	Disagree	Agree	Disagree	Agree	Agree	I have no opinion	I have no opinion	Strongly disagree	Disagree	Disagree	Strongly disagree	Strongly agree	I have no opinion	Disagree
r_267	27-40	Man	Higher II	Over 6 years	"friends only" privacy settings	"friends only" privacy settings	"friends only" privacy settings	"friends only" privacy settings	I don't have any profile	Agree	Agree	Agree	Agree	Agree	Agree	Agree	Agree	I have no opinion	Agree	I have no opinion	Agree	Agree	I have no opinion
r_268	to 26	Man	Higher II	Over 6 years	public profile	public profile	public profile	public profile	public profile	Agree	Agree	I have no opinion	I have no opinion	Agree	I have no opinion	I have no opinion	Agree	Agree	Agree	Agree	Agree	Agree	Agree
r_269	27-40	Woman	Higher I	Over 6 years	I don't have any profile	"friends only" privacy settings	"friends only" privacy settings	"friends only" privacy settings	I don't have any profile	Strongly agree	Strongly agree	I have no opinion	I have no opinion	Agree	Strongly agree	Agree	Agree	Strongly agree	Agree	Agree	I have no opinion	Agree	I have no opinion
r_270	to 26	Man	Higher II	Over 6 years	I don't have any profile	"friends only" privacy settings	"friends only" privacy settings	I don't have any profile	I don't have any profile	Agree	Agree	Disagree	Disagree	Agree	Disagree	Disagree	Agree	Strongly disagree	Strongly disagree	Strongly disagree	Agree	Strongly disagree	#N/A
r_271	to 26	Woman	Higher II	Over 6 years	I don't have any profile	"friends only" privacy settings	I don't have any profile	"friends only" privacy settings	I don't have any profile	Disagree	Agree	Disagree	Disagree	Agree	Agree	Disagree	Strongly disagree	Strongly disagree	Agree	Disagree	Strongly agree	Agree	Disagree
